# Supplementary material
Source: PubMed Central journal article supplement (PMC5933450)
Supplement: NIHMS961434-supplement-Supporting_Information.pdf [file NIHMS961434-supplement-Supporting_Information.pdf]

# Supporting Information

## Asymmetric Formal Synthesis of the Long-acting DPP-4 Inhibitor Omarigliptin

Feng Peng,<sup>†</sup> Yonggang Chen,<sup>\*†</sup> Cheng-yi Chen,<sup>†</sup> Peter G. Dormer,<sup>†</sup> Amude Kassim,<sup>†</sup> Mark McLaughlin,<sup>†</sup> Robert A. Reamer,<sup>†</sup> Edward C. Sherer,<sup>§</sup> Zhiguo J. Song,<sup>†</sup> Lushi Tan,<sup>†</sup> Matthew T. Tudge,<sup>†</sup> Baoqiang Wan,<sup>‡</sup> John Y. L. Chung,<sup>\*†</sup>

<sup>†</sup>Department of Process Research and Development and <sup>§</sup>Department of Modeling and Informatics, Merck & Co., Inc., P.O. Box 2000, Rahway, NJ 07065, USA

<sup>‡</sup>WuXi AppTec Co., Ltd., No. 1 Building, #288 FuTe ZhongLu, WaiGaoQiao Free Trade Zone, Shanghai 200131, China

[\*Corresponding authors: emails: john\_chung@merck.com, [yonggang.chen@merck.com](mailto:yonggang.chen@merck.com)]

### Table of Contents

|                                                                                           |     |
|-------------------------------------------------------------------------------------------|-----|
| 1. <sup>1</sup> H NMR spectrum of <b>14</b> .....                                         | S2  |
| 2. <sup>19</sup> F NMR spectrum of <b>14</b> .....                                        | S3  |
| 3. <sup>13</sup> C NMR spectrum of <b>14</b> .....                                        | S4  |
| 4. Chiral LC assay method and chromatograms for racemic and ( <i>R</i> )- <b>14</b> ..... | S5  |
| 5. <sup>1</sup> H NMR spectrum of <b>diamine L6</b> .....                                 | S6  |
| 6. <sup>13</sup> C NMR spectrum of <b>diamine L6</b> .....                                | S7  |
| 7. SFC chiral assay method and chromatogram for <b>racemic diamine</b> .....              | S8  |
| 8. SFC chiral assay chromatogram for ( <i>S,S</i> )- <b>diamine L6</b> .....              | S9  |
| 9. <sup>1</sup> H NMR spectrum of <b>12a</b> .....                                        | S10 |
| 10. <sup>13</sup> C NMR spectrum of <b>12a</b> .....                                      | S11 |
| 11. <sup>19</sup> F NMR spectrum of <b>12a</b> .....                                      | S12 |
| 12. <sup>1</sup> H NMR spectrum of <b>12b</b> .....                                       | S13 |
| 13. <sup>13</sup> C NMR spectrum of <b>12b</b> .....                                      | S14 |
| 14. <sup>19</sup> F NMR spectrum of <b>12b</b> .....                                      | S15 |
| 15. <sup>1</sup> H NMR spectrum of <b>11a</b> .....                                       | S16 |
| 16. <sup>13</sup> C NMR spectrum of <b>11a</b> .....                                      | S17 |
| 17. <sup>1</sup> H NMR spectrum of <b>11b</b> .....                                       | S18 |
| 18. <sup>13</sup> C NMR spectrum of <b>11b</b> .....                                      | S19 |
| 19. HPLC of compound <b>4</b> .....                                                       | S20 |
| 20. Cartesian coordinates (M06-2X/6-31+G**) for compounds <b>17a/b/c/d</b> .....          | S21 |

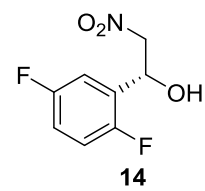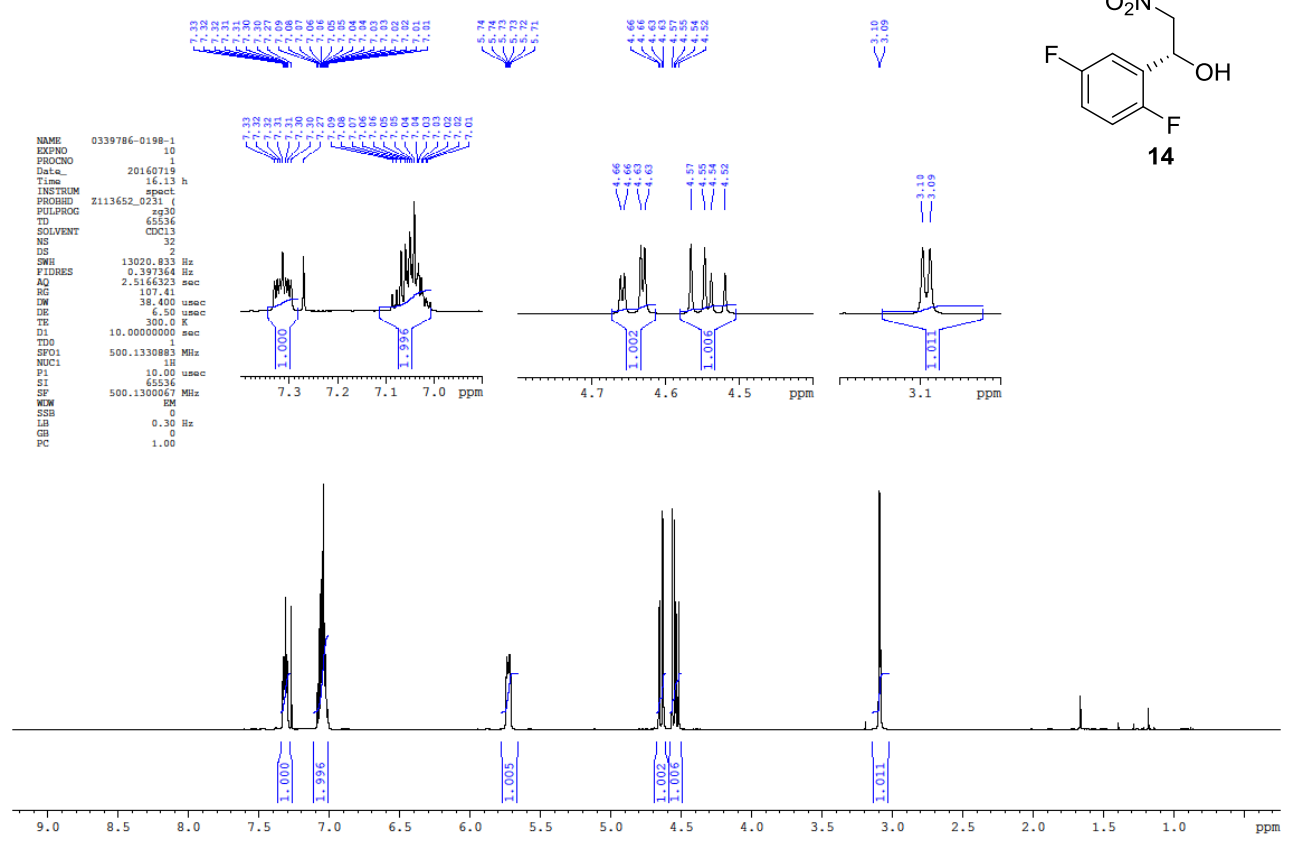

```

Current Data Parameters
NAME      0339786-0198-2
EXPNO     10
PROCNO    1

F2 - Acquisition Parameters
Date_     20160719
Time      16.25 h
INSTRUM   spect
PROBHD    Z113652_0231 (
PULPROG   zgfhigqn.2
TD        131072
SOLVENT   CDCl3
NS        32
DS        4
SWH       147058.828 Hz
FIDRES    2.243940 Hz
AQ        0.4456948 sec
RG        187.85
DW        3.400 usec
DE        6.50 usec
TE        300.0 K
D1        10.00000000 sec
D11       0.03000000 sec
D12       0.00002000 sec
TD0       1
SFO1      470.5217884 MHz
NUC1      19F
P1        15.00 usec

```

```

F2 - Processing parameters
SI        65536
SF        470.5923772 MHz
WDW       EM
SSB       0
LB        0.30 Hz
GB        0
PC        1.00

```

-116.82  
-116.86

-124.15  
-124.18

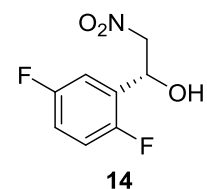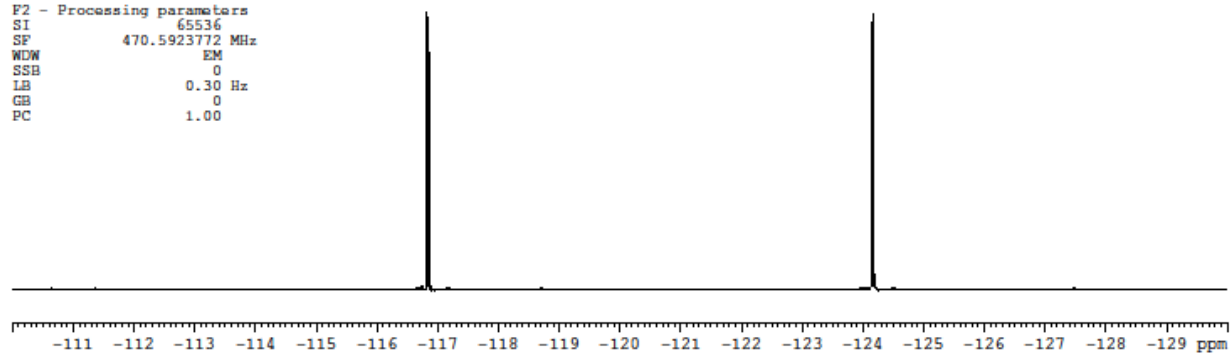

```

NAME      0339786-0198-3
EXPNO     10
PROCNO    1
Date_     20160719
Time      16.57 h
INSTRUM   spect
PROBHD    Z113652_0231 (
PULPROG   zgpg30
TD         131072
SOLVENT   CDC13
NS         1024
DS         4
SWH        40760.871 Hz
FIDRES    0.621962 Hz
AQ         1.6078665 sec
RG         187.85
DW         12.267 usec
DE         6.50 usec
TE         300.0 K
D1         0.10000000 sec
D11        0.03000000 sec
TD0        1
SFO1      125.7703643 MHz
NUC1       13C
P1         10.00 usec
SI         65536
SF         125.7577628 MHz
WDW        EM
SSB        0
LB         1.00 Hz
GB         0
PC         1.40

```

160.32  
 158.30  
 158.18  
 158.16  
 156.22  
 156.20  
 154.30  
 154.27  
 127.16  
 127.10  
 127.03  
 126.97  
 117.13  
 117.12  
 117.06  
 117.05  
 116.94  
 116.92  
 116.87  
 116.86  
 114.72  
 114.69  
 114.51  
 114.48  
 79.53  
 79.52  
 77.48  
 77.23  
 76.98  
 65.16  
 65.15

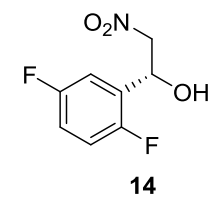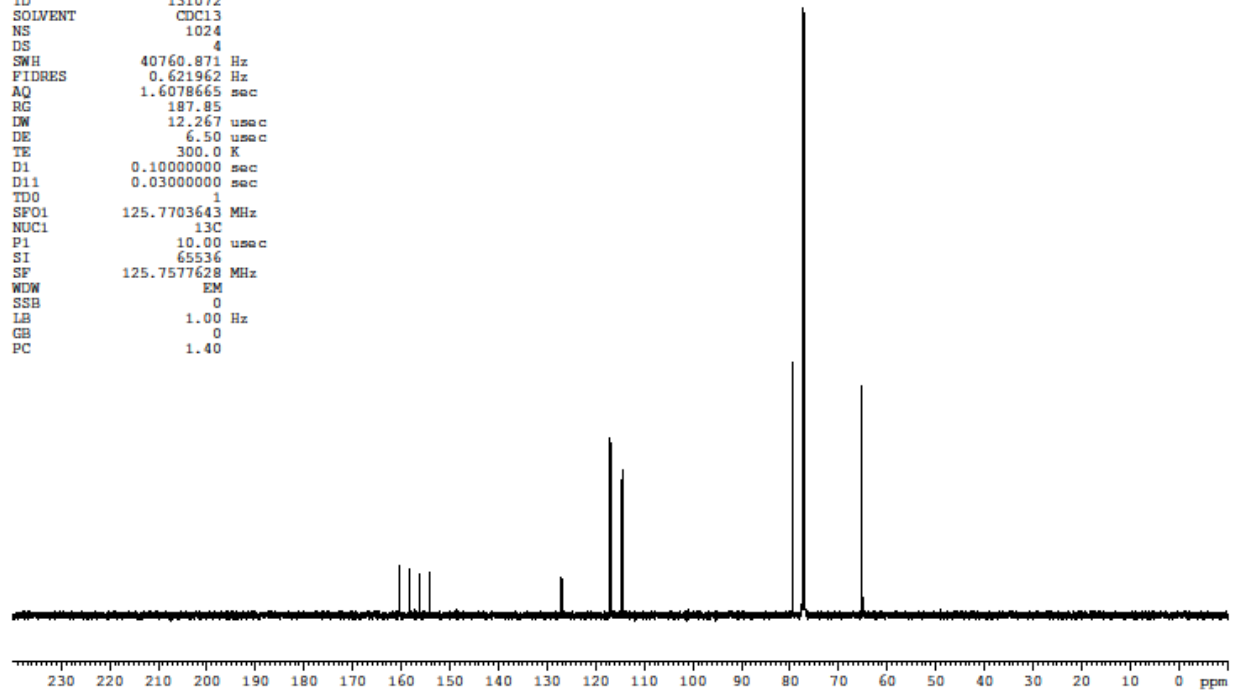

## Chiral LC Assay of 14

|                      |                          |
|----------------------|--------------------------|
| Column               | IA (25cm×4.6mm ID×5.0μm) |
| Mobile phase A       | Hexane                   |
| Mobile phase B       | EtOH                     |
| Temperature          | 40 °C                    |
| Gradient             | Hold 15min at 10% B      |
| Wavelength           | 267nm                    |
| Flow rate            | 1.0 mL/min               |
| Injection Volume     | 3 μL                     |
| Solution preparation | 5mg/mL                   |
| Diluent              | Methanol                 |
| Chiral marker        | 14+enantiomer            |

| Compound ID      | Retention Time (min) | Relative Retention Time (RRT) |
|------------------|----------------------|-------------------------------|
| Enantiomer of 14 | 8.0                  | 0.81                          |
| 14               | 9.9                  | 1.00                          |

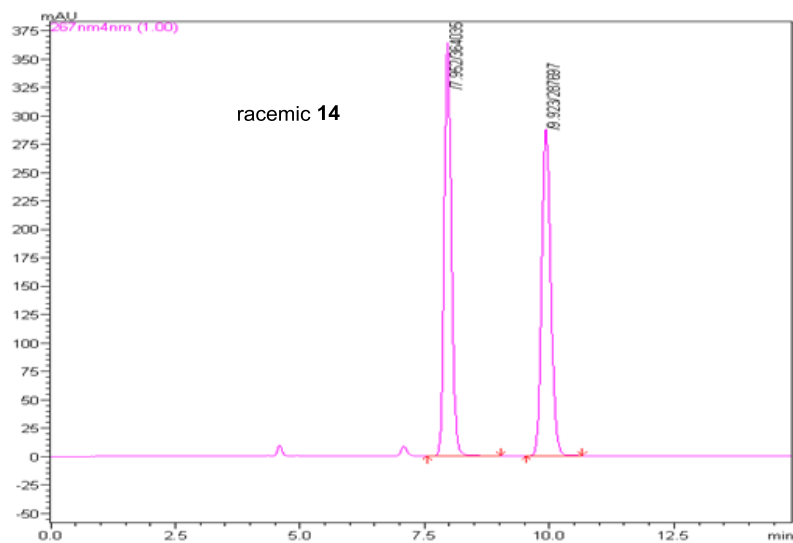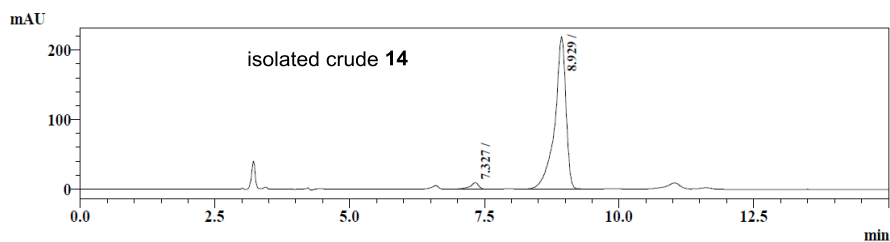

1 PDA Multi 1 / 267nm 4nm

PDA Ch1 267nm 4nm

| Peak# | Ret. Time | Name | Area    | Height | Area %  | Resolution | Tailing Factor |
|-------|-----------|------|---------|--------|---------|------------|----------------|
| 1     | 7.327     |      | 104227  | 9413   | 3.193   | 0.000      | 0.747          |
| 2     | 8.929     |      | 3160038 | 218498 | 96.807  | 5.140      | 0.753          |
| Total |           |      |         |        | 100.000 |            |                |

7.33  
7.33  
7.32  
7.32  
7.31  
7.31  
7.30  
7.27  
7.26  
7.25  
7.24  
7.24  
7.18  
7.18  
7.17  
7.17  
7.16  
7.16  
7.15  
7.15  
7.15  
7.14  
7.14  
7.13  
7.13  
7.12  
7.12  
7.11  
7.11  
7.10  
7.10  
7.09  
7.09  
7.08  
7.08  
7.08

3.73  
3.60  
3.57  
3.46  
3.43  
2.69  
2.15  
1.97  
1.96  
1.96  
1.95

NAME 0339786-0201-1  
EXPNO 10  
PROCNO 1  
Data\_ 20160715  
Time 12.13 h  
INSTRUM spect  
PROBHD Z113652\_0231 (4  
PULPROG zg30  
TD 65536  
SOLVENT CDCl3  
NS 32  
DS 2  
SWH 13020.833 Hz  
FIDRES 0.397364 Hz  
AQ 2.5166523 sec  
RG 137.98  
DW 38.400 usec  
DE 6.50 usec  
TE 300.0 K  
D1 10.00000000 sec  
D10 1  
SFO1 500.1330883 MHz  
NUC1 1H  
P1 10.00 usec  
SI 65536  
SF 500.1330038 MHz  
WDW EM  
SSB 0  
LB 0.30 Hz  
GB 0  
PC 1.00

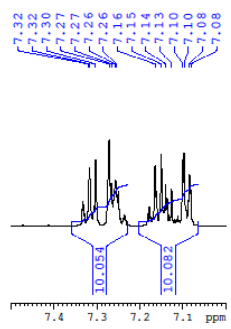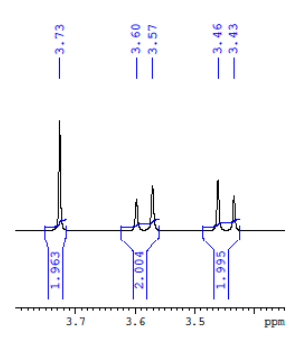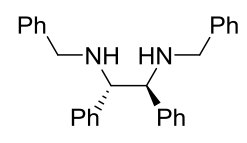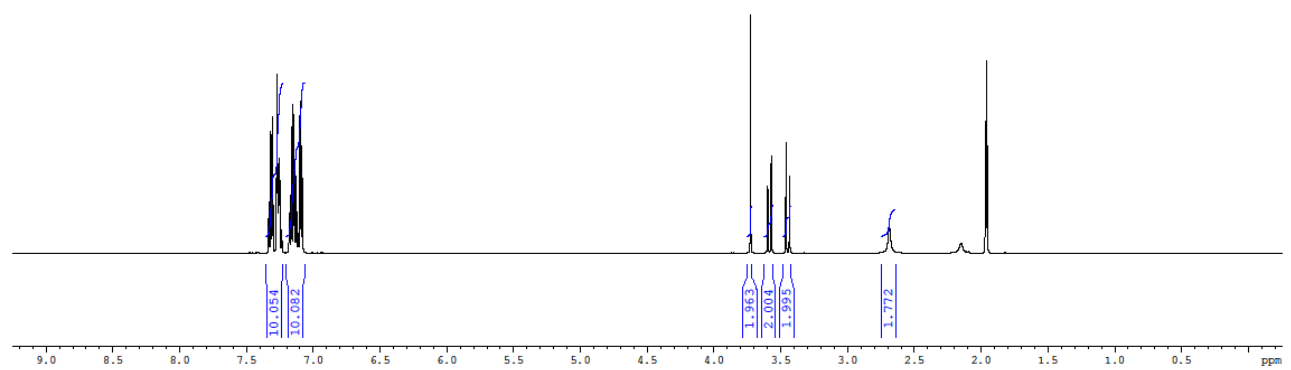

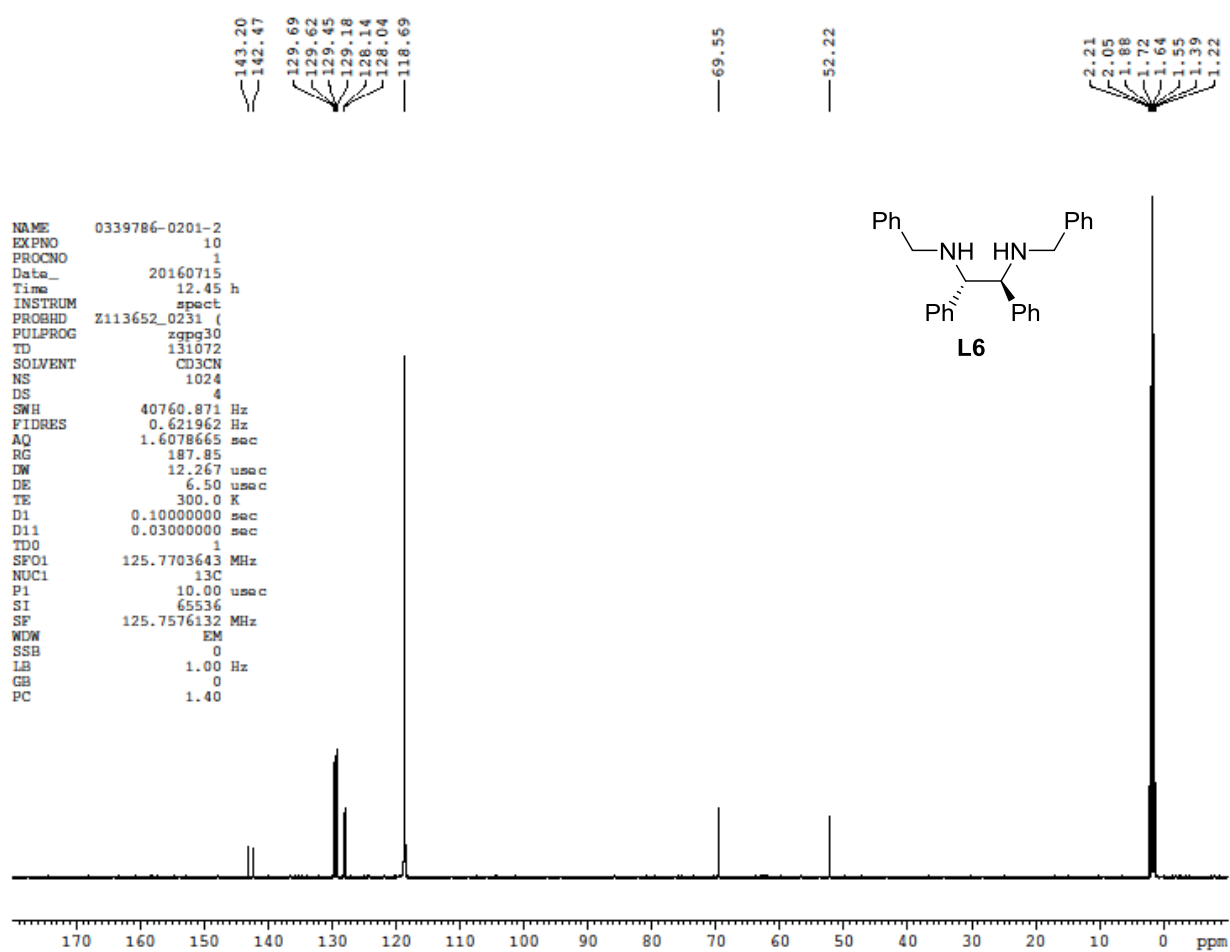

## SFC Chiral Assay of L6

|               |                                             |
|---------------|---------------------------------------------|
| Column:       | AD-3, 150 x 4.6 mm, 3 $\mu$ m particle size |
| Detector:     | 210 nm                                      |
| Temperature:  | 40°C                                        |
| Flow rate:    | 3.0 mL/min                                  |
| Mobile Phase: | A: CO <sub>2</sub><br>B: IPA with 25 nM IBA |

Run Time = 6.6 min, Pressure = 200 (bar), Temperature: 40°C, Column: Chiralpak AD-3

| Mobile Phase Program: | Time (min) | %A (CO <sub>2</sub> ) | %B |
|-----------------------|------------|-----------------------|----|
|                       | 0          | 99                    | 01 |
|                       | 5          | 60                    | 40 |
|                       | 6          | 60                    | 40 |
|                       | 6.1        | 99                    | 01 |

3.29 min = Desired Enantiomer

3.78 min = Undesired Enantiomer

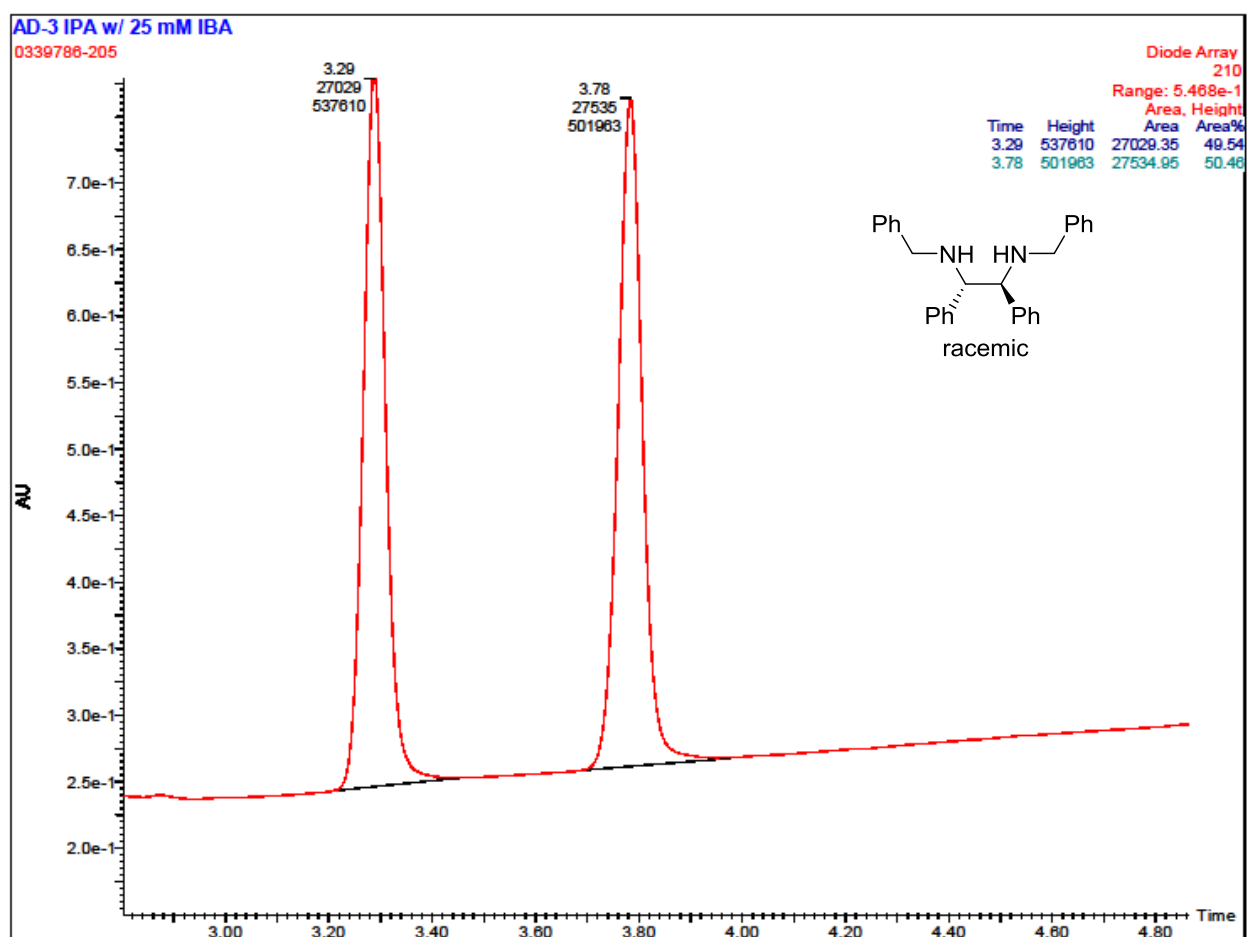



AD-3 IPA w/ 25 mM IBA

0339786-201

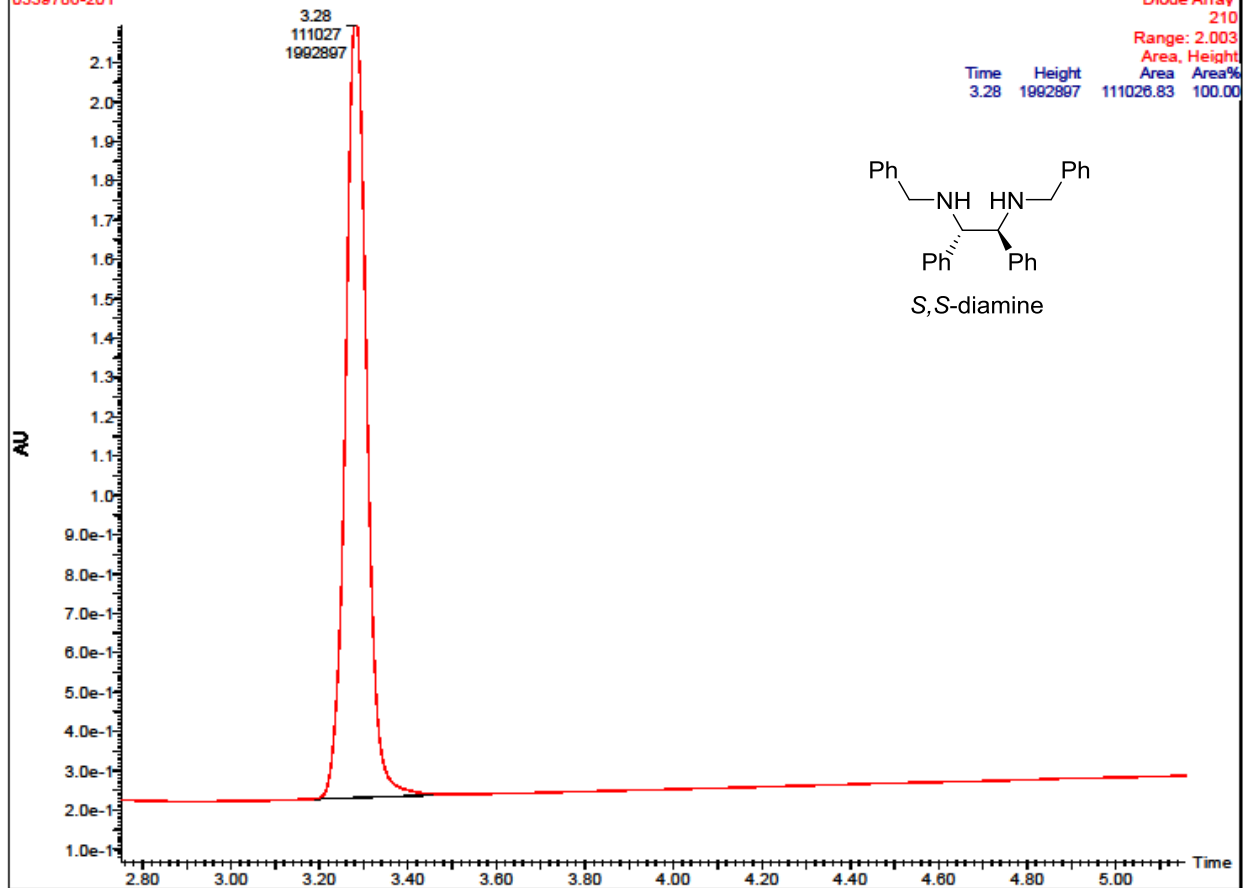

NAME 0330738-60-4  
 EXPNO 10  
 PROCNO 1  
 Date\_ 20130123  
 Time 17.13  
 INSTRUM spect  
 PROBR0 5 mm QNP 1H/13  
 PULPROG zg30  
 TD 65536  
 SOLVENT CDCl3  
 NS 32  
 DS 4  
 SWH 13020.833 Hz  
 FIDRES 0.198682 Hz  
 AQ 2.5166707 sec  
 RG 128  
 EM 38.400 usec  
 EK 6.50 usec  
 TE 300.0 K  
 D1 0.10000000 sec  
 TD0 1

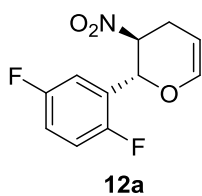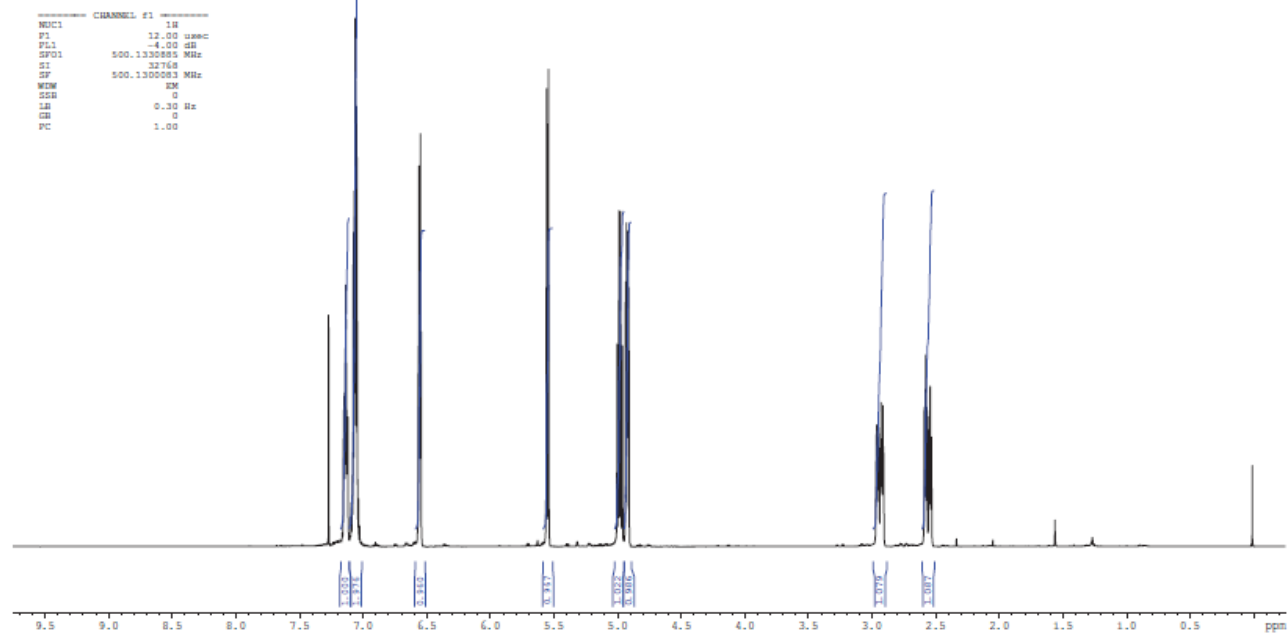

NAME 0330738-60-4  
 EXPNO 11  
 PROCNO 1  
 Date\_ 20130123  
 Time 17.29  
 INSTRUM spect  
 PROBHD 5 mm QNP 1H/13  
 PULPROG zgpg30  
 TD 131072  
 SOLVENT CDCl3  
 NS 512  
 DS 4  
 SWH 40322.582 Hz  
 FIDRES 0.307637 Hz  
 AQ 1.629352 sec  
 RG 8192  
 DW 12.400 usec  
 DE 6.50 usec  
 TE 300.0 K  
 D1 0.1000000 sec  
 D11 0.0300000 sec  
 TDO 1

CHANNEL #1  
 NUC1 13C  
 P1 2.50 usec  
 PL1 0.00 dB  
 SFO1 125.7703648 MHz

CHANNEL #2  
 CPDPRG2 waltz16  
 NUC2 1H  
 PCPD2 80.00 usec  
 PL2 120.00 dB  
 PL12 11.50 dB  
 SFO2 500.1325007 MHz  
 SI 65336  
 SF 125.7577650 MHz  
 MW XM  
 SR 0  
 LB 1.00 Hz  
 GB 0  
 PC 1.40

159.97  
158.03  
156.01  
137.23  
135.29  
135.27  
143.60  
134.30  
124.90  
124.84  
124.84  
117.90  
117.02  
117.02  
117.02  
117.02  
117.32  
117.32  
117.32  
115.35  
115.35  
115.35  
97.77

81.85  
77.40  
77.23  
76.88  
71.82

24.83

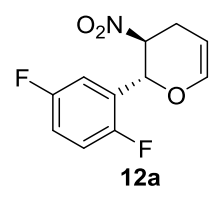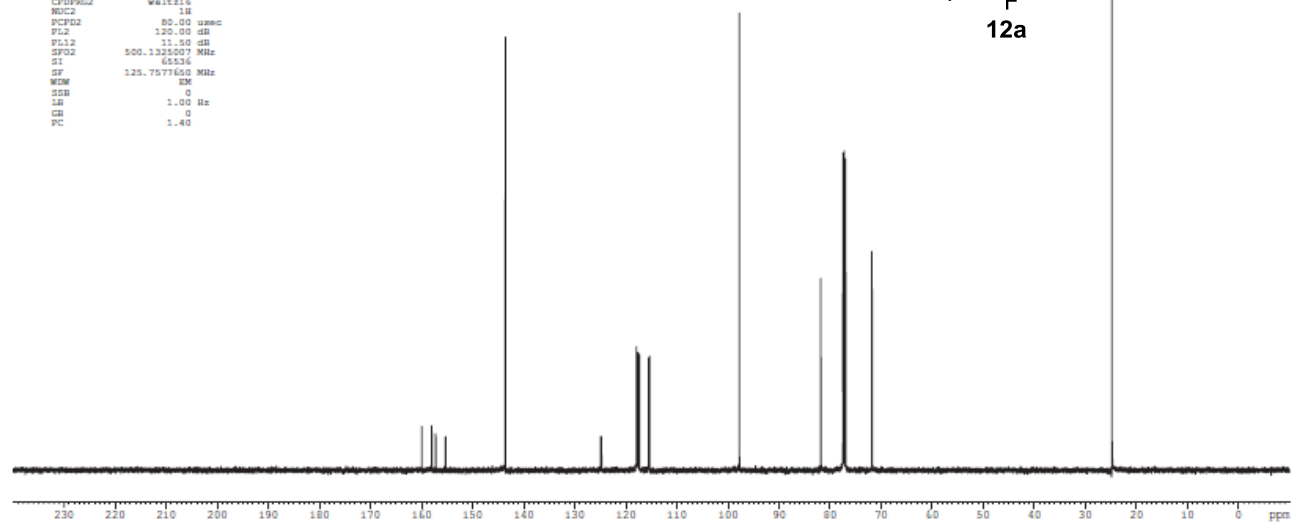

```

NAME      0330738-60-4
EXPNO     12
PROCNO    1
Date_     20120123
Time      11:31
INSTRUM   spect
PROBHD    5 mm QNP 1H/13
PULPROG   zgpg30
TD         131072
SOLVENT   CDCl3
NS         128
DS         4
SWH        141843.969 Hz
FIDRES    1.082184 Hz
AQ         0.4620823 sec
RG         64
DM         3.525 usec
DC         5.04 usec
TE         300.1 K
D1         0.10000000 sec
D11        0.03000000 sec
D12        0.00020000 sec
TD0        1

```

```

===== CHANNEL f1 =====
NUC1       13F
P1         5.00 usec
PL1        -4.00 dB
SFO1       470.527381 MHz

===== CHANNEL f2 =====
CPDPRG2   waltz16
NUC2       1H
PCPD2      85.00 usec
PL2        120.00 dB
PL12       12.00 dB
SFO2       500.1325077 MHz
SI         65516
SF         470.5923770 MHz
NUC#       0M
SSB        0
LB         1.00 Hz
GB         0
PC         1.00

```

-117.21  
 -117.31  
 -122.07  
 -122.91

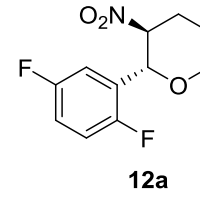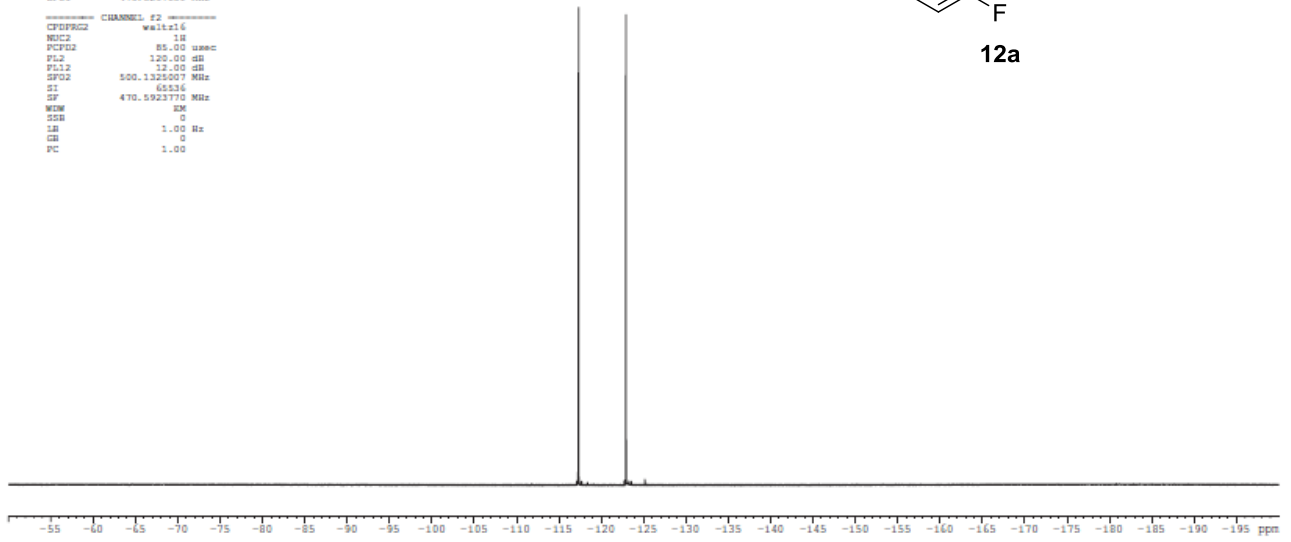

NAME 0330738-60-5  
 EXPNO 10  
 PROCNO 1  
 Date\_ 20130123  
 Time 17.37  
 INSTRUM spect  
 PROBRD 5 mm QNP 1H/13  
 PULPROG zgpg30  
 TD 65536  
 SOLVENT CDCl3  
 NS 32  
 DS 4  
 SWH 13020.833 Hz  
 FIDRES 0.198482 Hz  
 AQ 2.5166707 sec  
 RG 161.3  
 DM 39.400 usec  
 DE 6.50 usec  
 TE 300.0 K  
 D1 0.10000000 sec  
 TDO 1

----- CHANNEL f1 -----  
 NUC1 13C  
 P1 12.00 usec  
 PL1 4.00 dB  
 SFO1 500.1300851 MHz  
 SI 32768  
 SF 500.1300283 MHz  
 NMR  
 SSB 0  
 LB 0.30 Hz  
 GB 0  
 PC 1.00

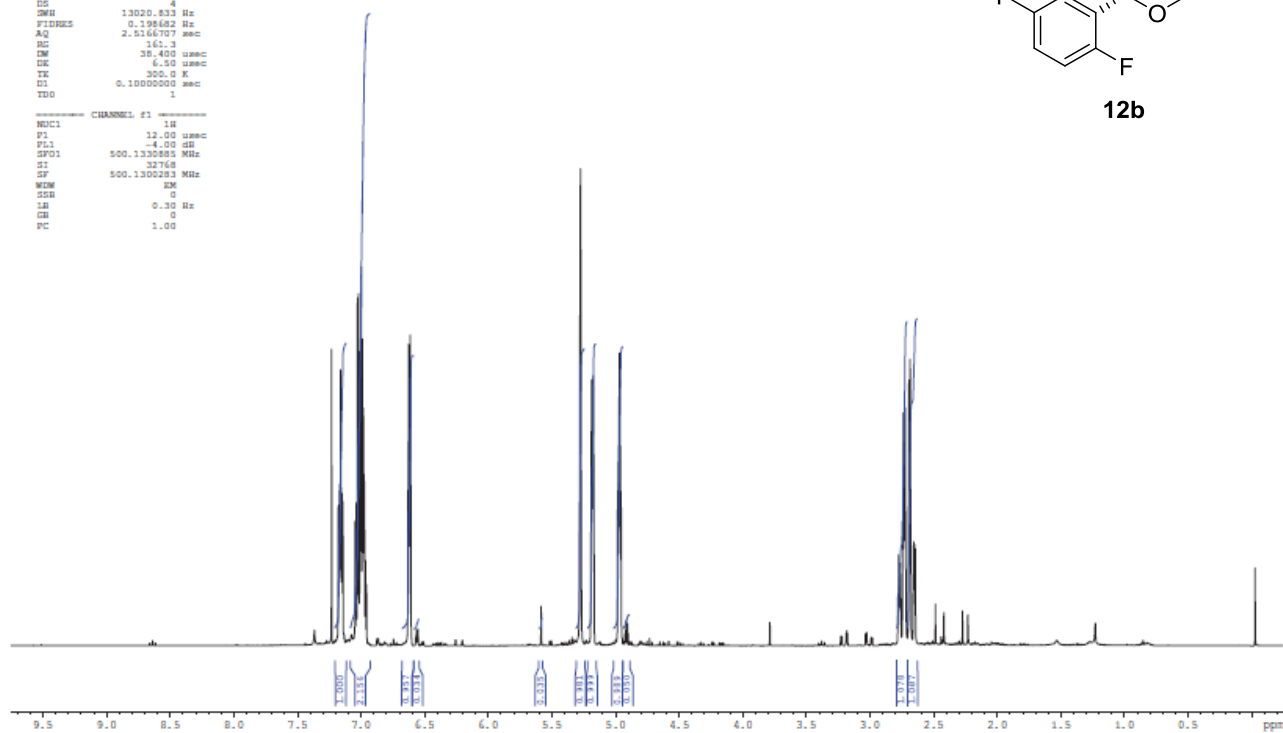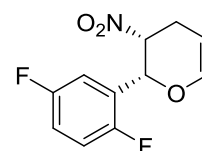

12b

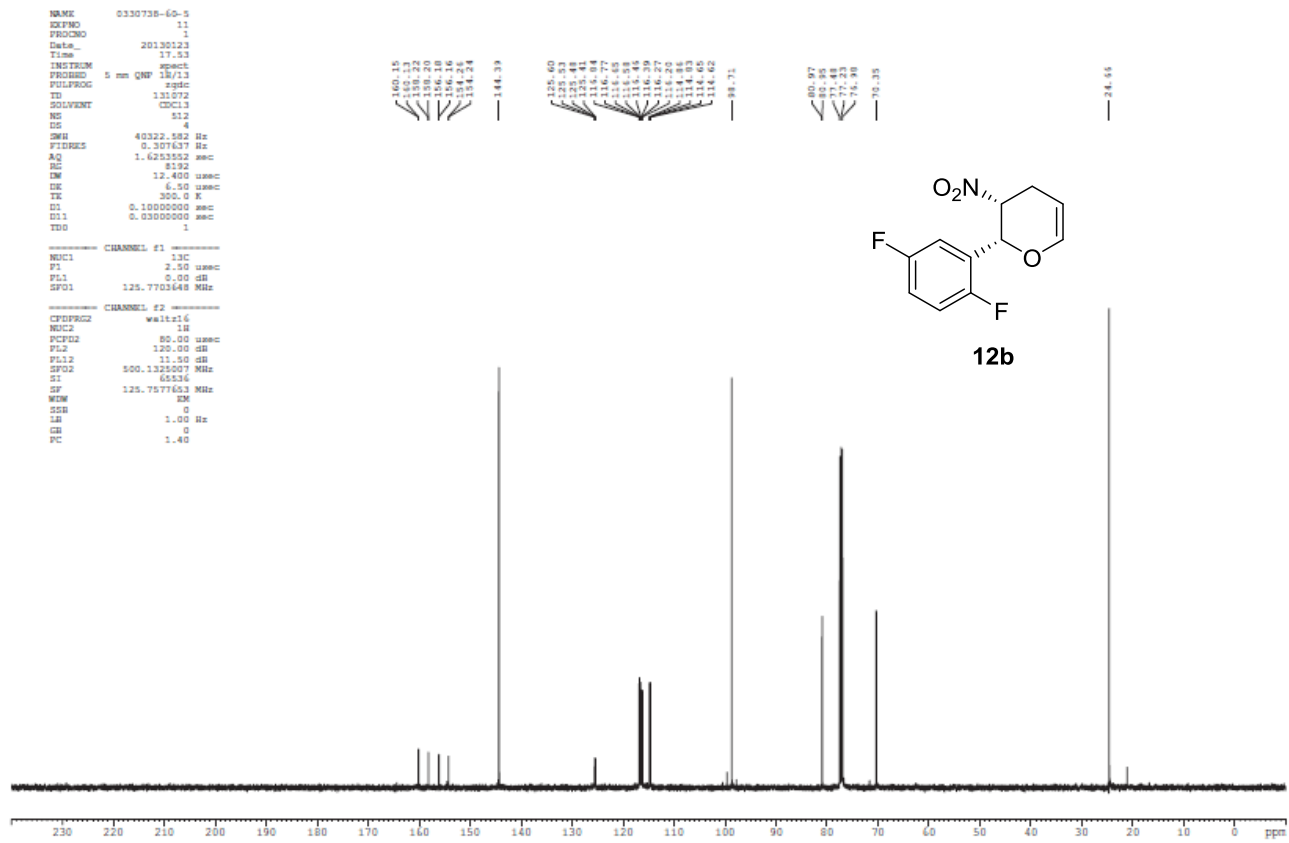

```

NAME      0330738-60-5
EXPNO     12
PROCNO    1
Date_     20130123
Time      11:55
INSTRUM   spect
PROBHD    5 mm QNP 1H/13
PULPROG   zgpg30
TD         131072
SOLVENT   CDCl3
NS         128
DS         4
SWH        141843.969 Hz
FIDRES    1.082184 Hz
AQ         0.4620823 sec
RG         64
DM         3.525 usec
DE         5.04 usec
TE         300.1 K
D1         0.10000000 sec
D1.1      0.03000000 sec
D1.2      0.00000000 sec
TD0        1

```

```

===== CHANNEL f1 =====
NUC1       13F
P1         5.00 usec
PL1        -4.00 dB
SFO1      470.5217881 MHz

```

```

===== CHANNEL f2 =====
CPDPRG2   waltz16
NUC2       1H
PCPD2     85.00 usec
PL2        120.00 dB
PL12      12.00 dB
SFO2      500.1325007 MHz
SI         65536
SF         470.5923770 MHz
NUC3       13C
SSB        0
LB         1.00 Hz
GB         0
PC         1.00

```

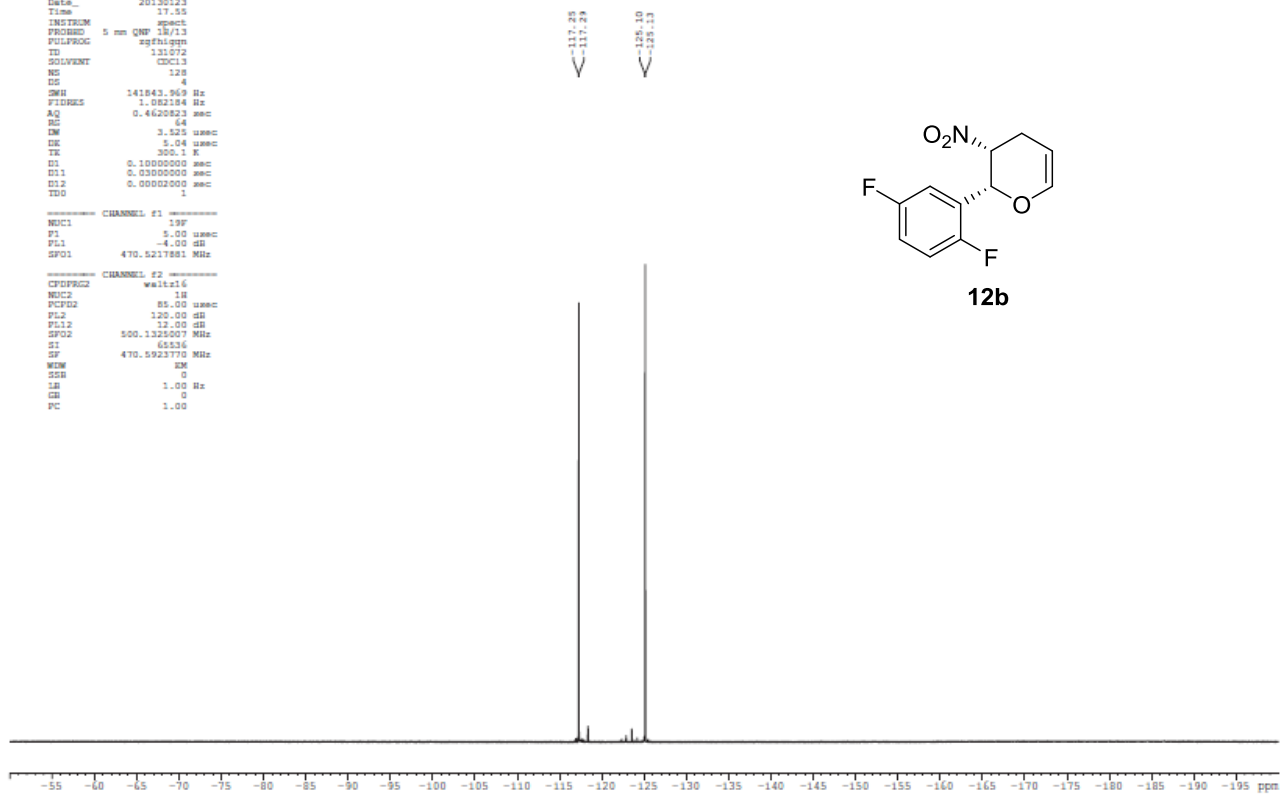

| Parameter      | Value                                        |
|----------------|----------------------------------------------|
| Title          | 0339786-0185-A.10.fid                        |
| Spectrometer   | spect                                        |
| Solvent        | CDCl3                                        |
| Temperature    | 300.0                                        |
| Pulse Sequence | zg30                                         |
| Probe          | 5 mm QNP 1H/ 13C/ 31P/ 19F Z-GRD Z8420/ 0073 |

0339786-0185-A/10 kassimam  
Pure Diastereomer A (solid)  
after SFC Purification

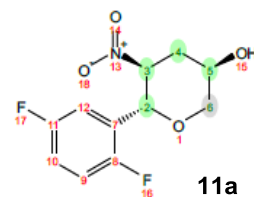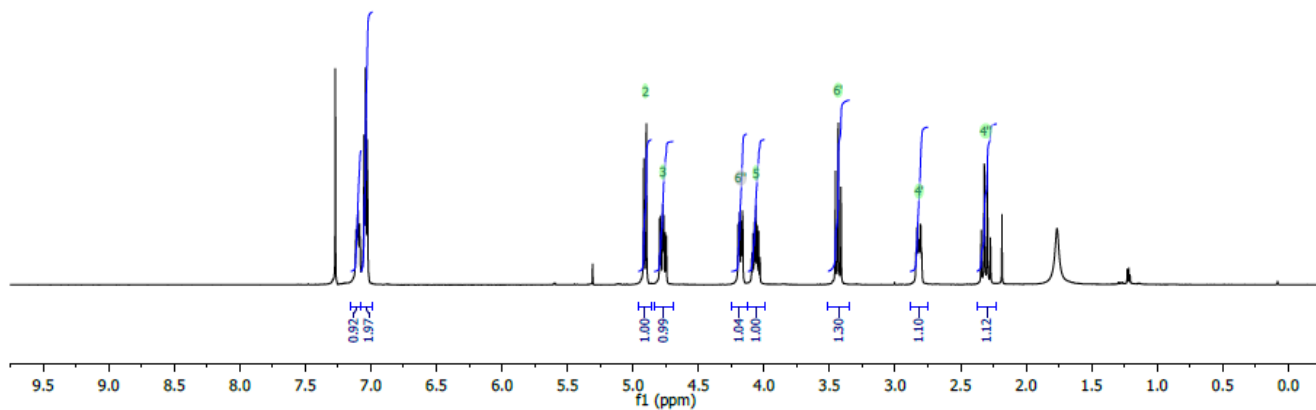



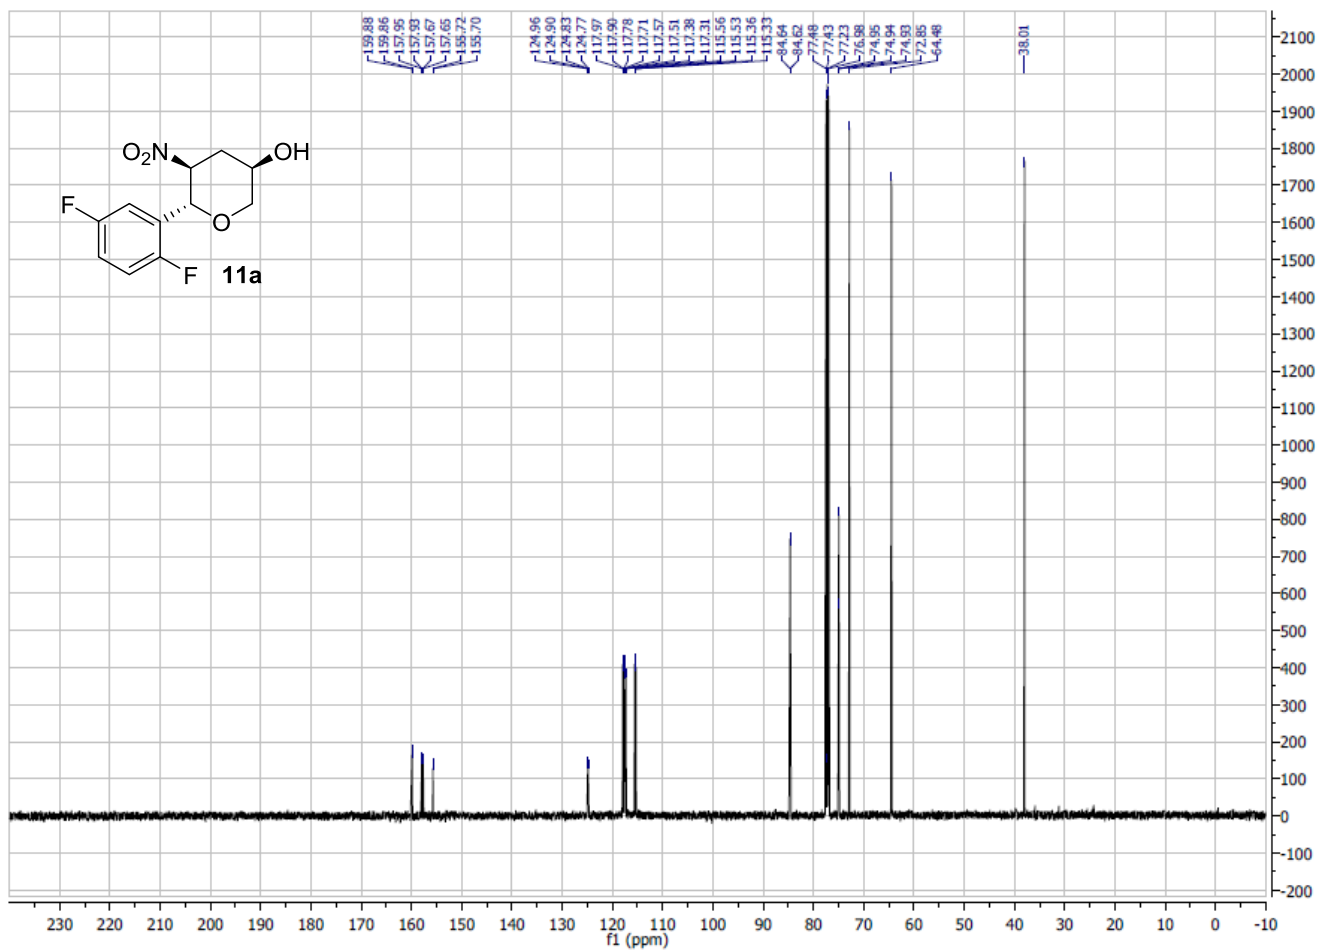

| Parameter      | Value                                        |
|----------------|----------------------------------------------|
| Title          | 0339786-0185-B.10.fid                        |
| Spectrometer   | spect                                        |
| Solvent        | CDCl3                                        |
| Temperature    | 300.0                                        |
| Pulse Sequence | zg30                                         |
| Probe          | 5 mm QNP 1H/ 13C/ 31P/ 19F Z-GRD Z8420/ 0073 |

0339786-0185-B/10 kassimam  
 Pure Diastereomer B (oil)  
 after SFC Purification

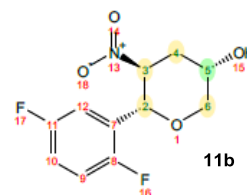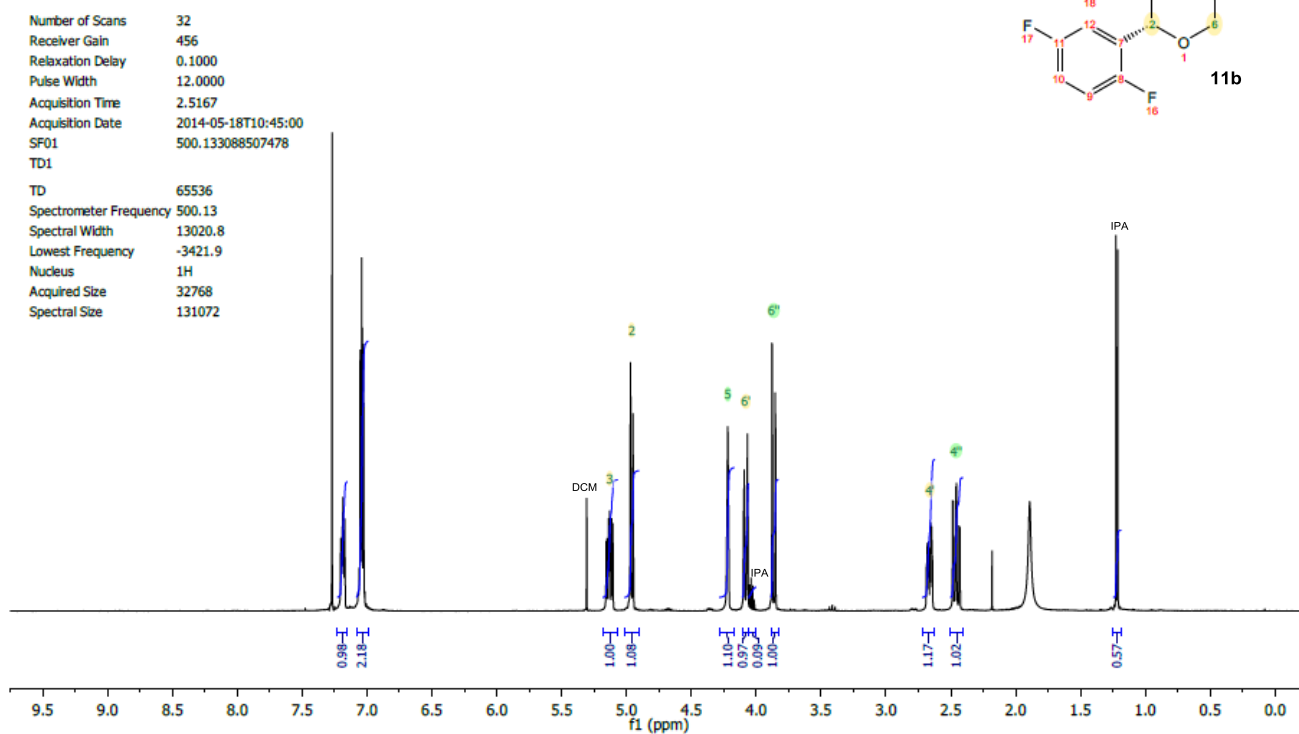

0339786-185B.11.fid  
rnmr500c c-13 (daytime queue)

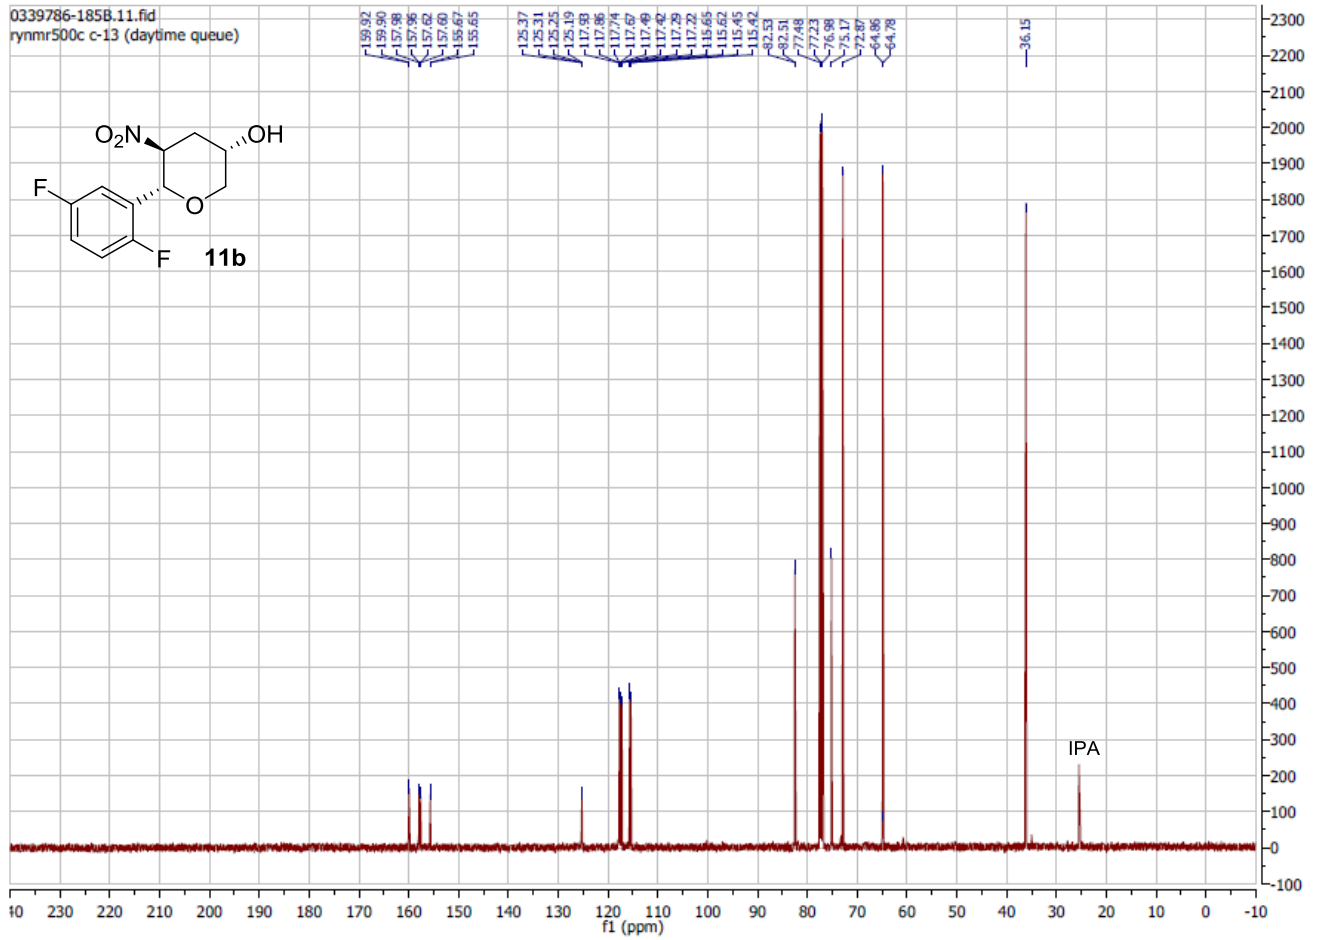

# HPLC of compound 4

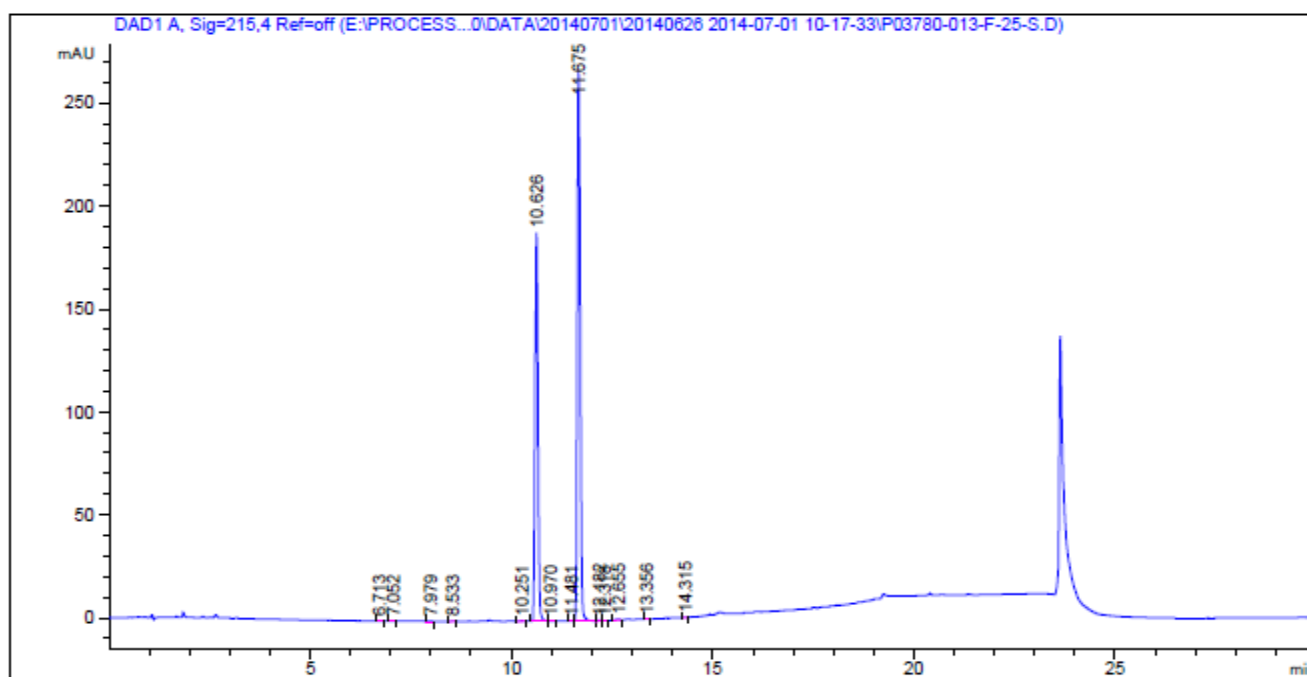

=====  
 Area Percent Report  
 =====

Sorted By : Signal  
 Multiplier : 1.0000  
 Dilution : 1.0000  
 Use Multiplier & Dilution Factor with ISTDs

Signal 1: DAD1 A, Sig=215,4 Ref=off

| Peak # | RetTime [min] | Type | Width [min] | Area [mAU*s] | Height [mAU] | Area %  |
|--------|---------------|------|-------------|--------------|--------------|---------|
| 1      | 6.713         | MM   | 0.0735      | 7.30334e-1   | 1.65546e-1   | 0.0319  |
| 2      | 7.052         | MM   | 0.0726      | 3.64797e-1   | 8.37995e-2   | 0.0159  |
| 3      | 7.979         | MM   | 0.0702      | 5.55305e-1   | 1.31890e-1   | 0.0242  |
| 4      | 8.533         | MM   | 0.0822      | 8.68835e-1   | 1.76161e-1   | 0.0379  |
| 5      | 10.251        | MM   | 0.1099      | 1.86373      | 2.82673e-1   | 0.0814  |
| 6      | 10.626        | MF   | 0.0823      | 933.84955    | 189.20198    | 40.7777 |
| 7      | 10.970        | FM   | 0.1029      | 1.03617      | 1.67806e-1   | 0.0452  |
| 8      | 11.481        | MF   | 0.0801      | 1.49801      | 3.11835e-1   | 0.0654  |
| 9      | 11.675        | FM   | 0.0833      | 1342.21863   | 268.61728    | 58.6096 |
| 10     | 12.182        | MF   | 0.0858      | 1.52569      | 2.96277e-1   | 0.0666  |
| 11     | 12.318        | FM   | 0.0704      | 2.84962e-1   | 6.74206e-2   | 0.0124  |
| 12     | 12.655        | MM   | 0.0915      | 3.19191      | 5.81224e-1   | 0.1394  |
| 13     | 13.356        | MM   | 0.0707      | 1.52656      | 3.59626e-1   | 0.0667  |
| 14     | 14.315        | MM   | 0.0636      | 5.86546e-1   | 1.53605e-1   | 0.0256  |

Totals : 2290.10101 460.59712

## Cartesian Coordinates for minima

| Compound 17      |             | M06/6-31G** | M062X/6-31G** | B3LYP/6-31G** w/ D2 | M062X/6-31+G** |
|------------------|-------------|-------------|---------------|---------------------|----------------|
| -NO <sub>2</sub> | -Cl         | $\Delta G$  | $\Delta G$    | $\Delta G$          | $\Delta G$     |
| 17a              | equa axial  | 0.0         | 0.0           | 0.0                 | 0.0            |
| 17b              | axial axial | 2.5         | 2.4           | 2.5                 | 2.7            |
| 17c              | equa equa   | 3.5         | 2.6           | 3.1                 | 2.6            |
| 17d              | axial equa  | 7.7         | 7.0           | 7.5                 | 7.3            |

### Compound 17a

#### M06-2X/6-31+G\*\* free energy -1364.893128

6 2.47949 0.744885 -1.07279  
6 0.480544 -0.170602 0.17103  
6 2.35101 -1.6096 -0.207005  
8 0.972891 -1.47823 -0.095754  
6 2.93452 -0.698761 -1.27605  
6 0.961173 0.766756 -0.961977  
1 2.8032 1.37182 -1.90853  
1 2.91004 1.15864 -0.156776  
1 0.886626 0.195252 1.12344  
1 2.53495 -2.66309 -0.411763  
1 2.57737 -1.07843 -2.24142  
1 4.02415 -0.770745 -1.26934  
1 0.463224 0.483287 -1.89292  
17 3.16434 -1.29701 1.39669  
6 -1.02221 -0.264796 0.243428  
6 -3.82981 -0.323508 0.363838  
6 -1.74354 0.657333 0.993035  
6 -1.73146 -1.23908 -0.459946  
6 -3.11447 -1.24617 -0.384904  
6 -3.12626 0.648625 1.06893  
1 -1.21295 -1.99219 -1.04215  
1 -3.63089 1.39876 1.66665  
1 -4.91227 -0.372932 0.388313  
7 0.471688 2.16091 -0.668078  
8 -0.570176 2.50049 -1.19752  
8 1.13231 2.83914 0.094042  
9 -1.05809 1.60279 1.66771  
9 -3.79224 -2.1905 -1.06708

### Compound 17b

#### M06-2X/6-31+G\*\* free energy -1364.888869

6 -2.52035 0.527899 -1.26627  
6 -0.41496 -0.428143 -0.250569  
6 -2.46316 -0.738029 0.910162  
8 -1.09908 -0.514448 0.988866  
6 -3.18715 0.316645 0.09356  
6 -1.00278 0.670058 -1.16465

1 -2.94261 1.40402 -1.76482  
1 -2.7107 -0.339641 -1.90829  
1 -0.584757 -1.36211 -0.805612  
1 -2.82255 -0.795111 1.93598  
1 -3.14851 1.24313 0.671909  
1 -4.23284 0.028236 -0.033433  
17 -2.80238 -2.41032 0.215085  
6 1.06348 -0.323873 0.025907  
6 3.82943 -0.147703 0.521396  
6 1.58515 0.566768 0.962408  
6 1.95863 -1.13745 -0.668699  
6 3.31691 -1.0305 -0.415244  
6 2.94193 0.664418 1.22234  
1 1.60829 -1.86076 -1.3985  
1 3.28779 1.38005 1.95925  
1 4.89896 -0.102157 0.691205  
9 0.745115 1.37695 1.62781  
9 4.16514 -1.82443 -1.09753  
1 -0.519489 0.584933 -2.13995  
7 -0.599571 2.05018 -0.697153  
8 0.496148 2.43891 -1.05635  
8 -1.37598 2.67932 -0.004856

#### **Compound 17c**

**M06-2X/6-31+G\*\* free energy -1364.888948**

6 2.29328 1.55494 -0.63751  
6 0.43136 0.199722 0.409901  
6 2.6329 -0.640286 0.457933  
8 1.26923 -0.935803 0.282261  
6 3.13238 0.27432 -0.644272  
6 0.814579 1.19473 -0.715867  
1 2.56645 2.20043 -1.47716  
1 2.46776 2.12192 0.28267  
1 0.597626 0.694673 1.37966  
1 3.03731 -0.256323 -1.59767  
1 4.18871 0.505409 -0.486296  
1 0.534595 0.759431 -1.67806  
6 -0.995453 -0.277888 0.307352  
6 -3.6806 -1.07828 0.096077  
6 -2.02745 0.463042 0.871178  
6 -1.32202 -1.45158 -0.373223  
6 -2.65329 -1.82352 -0.463288  
6 -3.35803 0.09058 0.779637  
1 -0.548204 -2.0744 -0.807631  
1 -4.1176 0.7139 1.23705  
1 -4.70607 -1.41469 -0.003979  
7 -0.034924 2.43075 -0.579836  
8 -1.03989 2.48463 -1.26259  
8 0.322965 3.27349 0.221033  
9 -1.71002 1.59455 1.53483  
9 -2.96111 -2.9603 -1.11755  
1 2.79379 -0.202762 1.45204  
17 3.49682 -2.19907 0.444089

**Compound 17d****M06-2X/6-31+G\*\* free energy -1364.88144**

6 -2.20888 1.15584 -1.54154  
6 -0.247112 -0.234028 -0.764433  
6 -2.40558 -1.06698 -0.443868  
8 -1.12805 -0.895238 0.119131  
6 -3.08927 0.270371 -0.650086  
6 -0.747065 1.19261 -1.09825  
1 -2.6101 2.17157 -1.58497  
1 -2.21021 0.764901 -2.56698  
1 -0.255579 -0.753283 -1.7389  
1 -3.23491 0.736084 0.326516  
1 -4.06556 0.117083 -1.11748  
6 1.15787 -0.319107 -0.222745  
6 3.79297 -0.474553 0.756095  
6 1.46128 -0.040563 1.10877  
6 2.20609 -0.680859 -1.06922  
6 3.49694 -0.745485 -0.569649  
6 2.75145 -0.116419 1.60793  
1 2.02847 -0.919398 -2.11339  
1 2.92559 0.11626 2.65214  
1 4.81661 -0.542621 1.10589  
9 0.475159 0.336193 1.93663  
9 4.4945 -1.09723 -1.40477  
1 -0.095782 1.60787 -1.87011  
7 -0.542599 2.1262 0.071035  
8 0.568661 2.61143 0.180536  
8 -1.47856 2.33557 0.816373  
1 -2.31842 -1.63013 -1.38475  
17 -3.33044 -2.10362 0.670681
